# Supplementary material for: Novel transmetalation reaction for electrolyte synthesis for rechargeable magnesium batteries
Source: Royal Society of Chemistry journal article supplement (doi:10.1039/c4ra03867c), 2014-01-01
Supplement: c4ra03867c1.pdf [file c4ra03867c1.pdf]

## Electronic Supplementary Information (ESI)

# Novel transmetalation reaction for electrolyte synthesis for rechargeable magnesium batteries

Zhirong Zhao-Karger,<sup>\*a</sup> Jonathan E. Mueller,<sup>b</sup> Xiangyu Zhao,<sup>a,c</sup> Olaf Fuhr,<sup>a,d</sup> Timo Jacob<sup>b,e</sup> and Maximilian Fichtner<sup>a,e</sup>

<sup>a</sup>Institute of Nanotechnology, Karlsruhe Institute of Technology (KIT), P.O. Box 3640, D-76021 Karlsruhe, Germany

<sup>b</sup>Institute of Electrochemistry, Ulm University, D-89069 Ulm, Germany

<sup>c</sup>College of Materials Science and Engineering, Nanjing Tech University, 210009 Nanjing, China

<sup>d</sup>Karlsruhe Nano Micro Facility (KNMF), Karlsruhe Institute of Technology (KIT), Hermann-von-Helmholtz-Platz 1, D-76344 Eggenstein-Leopoldshafen, Germany

<sup>e</sup>Helmholtz Institute Ulm for Electrochemical Storage (HIU), D-89081 Ulm, Germany

### Calculation details

All quantum mechanics calculations were performed with the Jaguar 8.0<sup>1</sup> program's implementation of the DFT-B3LYP functional, which utilizes the Becke three-parameter functional (B3)<sup>2</sup> combined with the correlation function developed by Lee, Yang, and Parr (LYP)<sup>3</sup>, using the LAVCP\*\*++ basis set. Calculations with the LAVCP\*\*+ basis set were also carried out for the sake of making consistent comparisons with results from ref. [4] (see Tables S1 and S3). The influence of solvent was included using the Poisson–Boltzmann solver implemented in the Jaguar program (the parameters used within the solvent model to describe THF, diglyme and tetraglyme are given in Table S2). The solver was utilized for each step of the SCF energy convergence procedure, such that the solvation energy was included in the SCF energy at each of the SCF iterations and in calculating the forces at each of the geometry optimization steps. Thus, each of the LUMO and HOMO energy level values reported in Tables S3 and S4 corresponds to the geometry resulting from minimizing the anion's structure in the relevant solvent.

Table S1 Summary and comparison of calculation parameters

|                 | Present work             | [4]                  |
|-----------------|--------------------------|----------------------|
| Program         | Jagaur 8.0               | Gaussian 09          |
| Method          | DFT                      | DFT                  |
| Functional      | B3LYP                    | B3LYP                |
| Basis Set       | LAVCP**++ (= 6-31++G**)  | 6-31+G* (= LAVCP**+) |
| Solvation Model | Poisson-Boltzmann Solver | IEFPCM               |

Table S2 Parameters used in solvation model

| Solvent    | Dielectric Constant | Probe Radius        |
|------------|---------------------|---------------------|
| THF        | 7.60 <sup>a</sup>   | 2.52 Å <sup>c</sup> |
| Diglyme    | 7.65 <sup>b</sup>   | 3.05 Å <sup>c</sup> |
| Tetraglyme | 7.70 <sup>b</sup>   | 3.52 Å <sup>c</sup> |

a: Ref. [5]; b: Ref. [6]; c: Ref. [7]

Table S3 Comparison of calculated LUMO and HOMO energy levels with results from Ref. [1] (in THF)

| Anion [Ph <sub>x</sub> AlCl <sub>4-x</sub> ] <sup>-</sup> | Source    | Basis Set | HOMO (eV) | LUMO (eV) | Gap (eV) |
|-----------------------------------------------------------|-----------|-----------|-----------|-----------|----------|
| AlCl <sub>4</sub> <sup>-</sup>                            | this work | LAVCP**++ | -7.920    | 0.034     | 7.954    |
|                                                           | this work | LAVCP**+  | -7.920    | 0.034     | 7.954    |
|                                                           | [4]       | 6-31+G*   | -7.53     | 1.01      | 8.54     |
| PhAlCl <sub>3</sub> <sup>-</sup>                          | this work | LAVCP**++ | -6.638    | -0.346    | 6.293    |
|                                                           | this work | LAVCP**+  | -6.627    | -0.328    | 6.300    |
|                                                           | [4]       | 6-31+G*   | -6.20     | 0.23      | 6.43     |
| Ph <sub>2</sub> AlCl <sub>2</sub> <sup>-</sup>            | this work | LAVCP**++ | -6.383    | -0.259    | 6.124    |
|                                                           | this work | LAVCP**+  | -6.368    | -0.234    | 6.134    |
|                                                           | [4]       | 6-31+G*   | -5.98     | 0.34      | 6.32     |
| Ph <sub>3</sub> AlCl <sup>-</sup>                         | this work | LAVCP**++ | -6.126    | -0.073    | 6.052    |
|                                                           | this work | LAVCP**+  | -6.115    | 0.044     | 6.159    |
|                                                           | [4]       | 6-31+G*   | -5.76     | 0.38      | 6.15     |
| Ph <sub>4</sub> Al <sup>-</sup>                           | this work | LAVCP**++ | -5.829    | -0.096    | 5.733    |
|                                                           | this work | LAVCP**+  | -5.825    | -0.073    | 5.752    |
|                                                           | [4]       | 6-31+G*   | -5.33     | 0.64      | 5.97     |

Table S4 Calculations of HOMO and LUMO energy levels for anions of interest in three different solvents

| Anion [R <sub>x</sub> AlCl <sub>4-x</sub> ] <sup>-</sup><br>x= 1, 2, 3 | Solvent    | HOMO (eV) | LUMO (eV) | Gap (eV) |
|------------------------------------------------------------------------|------------|-----------|-----------|----------|
| [EtAlCl <sub>3</sub> ] <sup>-</sup>                                    | THF        | -6.693    | 0.092     | 6.785    |
|                                                                        | Diglyme    | -6.689    | 0.092     | 6.781    |
|                                                                        | Tetraglyme | -6.687    | 0.091     | 6.778    |
| [Et <sub>2</sub> AlCl <sub>2</sub> ] <sup>-</sup>                      | THF        | -5.865    | 0.089     | 5.954    |
|                                                                        | Diglyme    | -5.859    | 0.089     | 5.948    |
|                                                                        | Tetraglyme | -5.859    | 0.088     | 5.948    |
| [Et <sub>3</sub> AlCl] <sup>-</sup>                                    | THF        | -5.465    | 0.101     | 5.557    |
|                                                                        | Diglyme    | -5.452    | 0.101     | 5.552    |
|                                                                        | Tetraglyme | -5.448    | 0.099     | 5.546    |
| [MesAlCl <sub>3</sub> ] <sup>-</sup>                                   | THF        | -6.116    | -0.284    | 5.832    |
|                                                                        | Diglyme    | -6.112    | -0.279    | 5.832    |
|                                                                        | Tetraglyme | -6.108    | -0.276    | 5.832    |
| [Mes <sub>2</sub> AlCl <sub>2</sub> ] <sup>-</sup>                     | THF        | -5.825    | -0.057    | 5.768    |
|                                                                        | Diglyme    | -5.804    | -0.035    | 5.769    |
|                                                                        | Tetraglyme | -5.789    | -0.043    | 5.755    |
| [Mes <sub>3</sub> AlCl] <sup>-</sup>                                   | THF        | -5.571    | 0.096     | 5.667    |
|                                                                        | Diglyme    | -5.559    | 0.103     | 5.662    |
|                                                                        | Tetraglyme | -5.547    | 0.111     | 5.658    |
| [TMPAlCl <sub>3</sub> ] <sup>-*</sup>                                  | THF        | -5.023    | 0.084     | 5.107    |
|                                                                        | Diglyme    | -5.011    | 0.084     | 5.095    |
|                                                                        | Tetraglyme | -5.011    | 0.084     | 5.095    |
| [TMP <sub>2</sub> AlCl <sub>2</sub> ] <sup>-*</sup>                    | THF        | -4.568    | 0.125     | 4.693    |
|                                                                        | Diglyme    | -4.565    | 0.125     | 4.690    |
|                                                                        | Tetraglyme | -4.563    | 0.123     | 4.686    |
| [TMP <sub>3</sub> AlCl] <sup>-*</sup>                                  | THF        | -4.094    | 0.117     | 4.211    |
|                                                                        | Diglyme    | -4.093    | 0.112     | 4.205    |
|                                                                        | Tetraglyme | -4.090    | 0.110     | 4.200    |
| [PhAlCl <sub>3</sub> ] <sup>-</sup>                                    | THF        | -6.638    | -0.346    | 6.293    |
|                                                                        | Diglyme    | -6.635    | -0.342    | 6.293    |
|                                                                        | Tetraglyme | -6.623    | -0.333    | 6.290    |
| [Ph <sub>2</sub> AlCl <sub>2</sub> ] <sup>-</sup>                      | THF        | -6.383    | -0.259    | 6.124    |
|                                                                        | Diglyme    | -6.386    | -0.248    | 6.120    |
|                                                                        | Tetraglyme | -6.360    | -0.242    | 6.118    |
| [Ph <sub>3</sub> AlCl] <sup>-</sup>                                    | THF        | -6.126    | -0.073    | 6.052    |
|                                                                        | Diglyme    | -6.116    | -0.064    | 6.051    |
|                                                                        | Tetraglyme | -6.110    | -0.059    | 6.051    |
| [HMDSAAlCl <sub>3</sub> ] <sup>-**</sup>                               | THF        | -6.033    | -0.007    | 6.026    |
|                                                                        | Diglyme    | -6.030    | -0.007    | 6.022    |
|                                                                        | Tetraglyme | -6.028    | -0.008    | 6.019    |
| [HMDS <sub>2</sub> AlCl <sub>2</sub> ] <sup>-**</sup>                  | THF        | -5.775    | 0.002     | 5.778    |
|                                                                        | Diglyme    | -5.770    | 0.002     | 5.772    |
|                                                                        | Tetraglyme | -5.769    | 0.000     | 5.769    |
| [HMDS <sub>3</sub> AlCl] <sup>-**</sup>                                | THF        | -5.470    | 0.116     | 5.486    |
|                                                                        | Diglyme    | -5.472    | 0.009     | 5.481    |
|                                                                        | Tetraglyme | -5.471    | 0.010     | 5.480    |
| [PhOAlCl <sub>3</sub> ] <sup>-</sup>                                   | THF        | -5.882    | -0.173    | 5.709    |
|                                                                        | Diglyme    | -5.876    | -0.170    | 5.707    |
|                                                                        | Tetraglyme | -5.861    | -0.162    | 5.700    |
| [(PhO) <sub>2</sub> AlCl <sub>2</sub> ] <sup>-</sup>                   | THF        | -5.776    | -0.140    | 5.637    |
|                                                                        | Diglyme    | -5.760    | -0.136    | 5.624    |
|                                                                        | Tetraglyme | -5.751    | -0.133    | 5.618    |
| [(PhO) <sub>3</sub> AlCl] <sup>-</sup>                                 | THF        | -5.619    | -0.092    | 5.527    |
|                                                                        | Diglyme    | -5.603    | -0.087    | 5.516    |
|                                                                        | Tetraglyme | -5.586    | -0.082    | 5.504    |

\* TMP = 2,2,6,6-tetramethylpiperidine ; \*\* HMDS = hexamethyldisilazide

### Experimental section

All the samples were handled in an argon-filled glove box with water and oxygen concentrations below 1 ppm. The chemical operations were either carried out on the bench under Ar (99.9999 %) using standard Schlenk techniques or in a glove box. The chemicals including anhydrous solvents, magnesium chloride (99%), ethylaluminum dichloride, diethylaluminum chloride, and triethylaluminum were purchased from Sigma-Aldrich. Dichloroaluminum phenolate was synthesized according to the procedure reported in the literature.<sup>8</sup>

Powder X-ray diffraction (XRD) patterns were recorded in the 2θ range 10-75° using a Philips X'pert diffractometer equipped with Cu Kα source. Scanning electron microscopy (SEM) was performed with a LEO 1530 at 15 keV using carbon tape as the substrate. <sup>1</sup>H, <sup>13</sup>C and <sup>27</sup>Al NMR spectra were recorded with a Bruker Advance II 500 spectrometer. The <sup>13</sup>C NMR spectra were broadband <sup>1</sup>H decoupled. A 1 M solution of Al(NO<sub>3</sub>)<sub>3</sub> in D<sub>2</sub>O was used as the reference for the <sup>27</sup>Al NMR. THF-*d*<sub>8</sub> or C<sub>6</sub>D<sub>6</sub> were used as solvents for NMR measurements and the chemical shifts were reported in ppm using the residual solvent peak as the reference.<sup>3</sup> X-ray single crystal diffraction was performed with a STOE IPDS II diffractometer using Mo-Kα (λ = 0.71073 Å) radiation. Structure solution and refinement against F<sub>2</sub> were carried out using HELXS and SHELXL software.<sup>9</sup>

**Representative synthesis of the electrolytes of  $\text{MgCl}_2\text{-R}_x\text{AlCl}_{3-x}$  ( $x = 1, 2, 3$ )**

In an argon-filled glove box, 0.35 ml (2.7 mmol) of  $\text{Et}_2\text{AlCl}$  was added to a vial charged with 4 ml of anhydrous THF and 384 mg (4.03 mmol) of  $\text{MgCl}_2$  and stirred for 24 hours at room temperature.  $^1\text{H-NMR}$  ( $d_8\text{-THF}$ , 500 MHz):  $\delta$  = -0.17 (dd,  $\text{CH}_2$ ), 0.96 (t, 0.96), 1.78 (m, THF), 3.64 (m, THF);  $^{13}\text{C}\{^1\text{H}\}\text{-NMR}$  ( $d_8\text{-THF}$ , 126 MHz):  $\delta$  6.04 (s,  $\text{CH}_2$ ), 8.70 (m,  $\text{CH}_3$ ), 24.3 (m, THF), 66.7 (m, THF);  $^{27}\text{Al-NMR}$  ( $\text{C}_6\text{D}_6$ , 130 MHz) 72.8 (s,  $[\text{Et}_2\text{AlCl}_2]$ ), 163.0 (s, weak,  $\text{Et}_2\text{AlCl}$ ).

The solutions of  $\text{MgCl}_2\text{-EtAlCl}_2$  and  $\text{MgCl}_2\text{-Et}_3\text{AlCl}$  in diglyme or tetraglyme were prepared using the same procedures, the amount of aluminium compounds were determined by completely dissolving  $\text{MgCl}_2$ .

**Preparation of  $[\text{Mg}_2(\mu\text{-Cl})_3(\text{THF})_6][\text{Et}_2\text{AlCl}_2]$** 

As-prepared THF solution of  $\text{MgCl}_2\text{-Et}_2\text{AlCl}$  was crystallized by slow diffusion of anhydrous hexane. The resulting crystals were washed with hexane and dried under vacuum.  $^1\text{H-NMR}$  ( $d_8\text{-THF}$ , 500 MHz):  $\delta$  - 0.16 (dd,  $\text{CH}_2$ ), 0.98 (t, 0.96), 1.78 (m, THF), 3.64 (m, THF);  $^{13}\text{C}\{^1\text{H}\}\text{-NMR}$  ( $d_8\text{-THF}$ , 126 MHz):  $\delta$  6.04 (s,  $\text{CH}_2$ ), 8.80 (m,  $\text{CH}_3$ ), 4.68 (s,  $\text{CH}_3$ ), 24.3 (m, THF), 66.7 (m, THF);  $^{27}\text{Al-NMR}$  ( $\text{C}_6\text{D}_6$ , 130 MHz) 72.4 (s,  $[\text{Et}_2\text{AlCl}_2]$ ), 168.6 (s, weak,  $\text{Et}_2\text{AlCl}$ ).

**Synthesis of the electrolytes of Mg-TCP/DEG**

In an argon-filled glove box, 207 mg (1.08 mmol) of  $\text{PhOAlCl}_2$  was dissolved in 1.5 ml diglyme in a vial; subsequently, 87.4 mg (0.92 mmol) of  $\text{MgCl}_2$  was added and stirred for 24 hours at room temperature.  $^1\text{H-NMR}$  ( $d_8\text{-THF}$ , 500 MHz):  $\delta$  1.49 (s,  $\text{OCH}_3$ ), 3.11–3.52 (m,  $(\text{CH}_2)_4\text{O}$ ), 7.09 (m, 4H, Ph), 7.78 (s, 1H, Ph);  $^{27}\text{Al-NMR}$  ( $\text{C}_6\text{D}_6$ , 130 MHz) 89.4 (s,  $[\text{PhOAlCl}_2]$ ), 103.6 (s,  $\text{Al}_2\text{Cl}_6$ ).

**Crystallographic data for  $[\text{Mg}_2(\mu\text{-Cl})_3(\text{THF})_6][\text{Et}_2\text{AlCl}_2]$**   $\ddagger$   $M_r = 743.59$ ; space group  $P2_1/c$ ;  $a = 12.905(3)\text{\AA}$ ;  $b = 24.536(5)\text{\AA}$ ;  $c = 12.310(3)\text{\AA}$ ;  $\alpha = 90^\circ$ ;  $\beta = 90.12(3)^\circ$ ;  $\gamma = 90^\circ$ ;  $V = 3897.8(14)\text{\AA}^3$ ;  $Z = 4$ ;  $T = 180\text{ K}$ ; colorless rod; crystal size:  $0.28 \times 0.25 \times 0.24\text{ mm}$ ; index ranges:  $-14 \leq h \leq 15$ ,  $-28 \leq k \leq 28$ ,  $-14 \leq l \leq 14$ ;  $\rho_{\text{calcd}} = 1.267\text{ g cm}^{-3}$ ;  $\mu(\text{Mo-K}\alpha) = 0.462\text{ mm}^{-1}$ ;  $R_I(1 > 2\sigma(I)) = 0.0878$ ,  $wR_2(\text{all data}) = 0.2686$ .

**Crystallographic data for  $[\text{Mg}_2(\mu\text{-Cl})_2(\text{diglyme})_2]\text{Cl}_2$**   $\ddagger$   $M_r = 458.76$ ; space group  $P2_1/c$ ;  $a = 10.3321(7)\text{\AA}$ ;  $b = 7.5712(7)\text{\AA}$ ;  $c = 14.2704(11)\text{\AA}$ ;  $\alpha = 90^\circ$ ;  $\beta = 110.807(5)^\circ$ ;  $\gamma = 90^\circ$ ;  $V = 1043.52(14)\text{\AA}^3$ ;  $Z = 2$ ;  $T = 150\text{ K}$ ; colorless rod; crystal size:  $0.15 \times 0.04 \times 0.03\text{ mm}$ ; index ranges:  $-12 \leq h \leq 12$ ,  $-9 \leq k \leq 5$ ,  $-14 \leq l \leq 17$ ;  $\rho_{\text{calcd}} = 1.460\text{ g cm}^{-3}$ ;  $\mu(\text{Mo-K}\alpha) = 0.650\text{ mm}^{-1}$ ;  $R_I(1 > 2\sigma(I)) = 0.0306$ ,  $wR_2(\text{all data}) = 0.0593$ .

**Electrochemistry** Electrochemical studies were performed in Swagelok type cells. The fabrication of all electrodes and the construction of the electrochemical cells were carried in an argon-filled glove box. Cyclic voltammograms were obtained using a Biologic VMP-3 potentiostat with a two-electrode cell comprising a Pt disc as working electrode, Mg foil as reference electrode at a scan rate of  $25\text{ mV s}^{-1}$ . The conductivities were measured at  $25^\circ\text{C}$  by a conductivity meter CDM 230, Meter Lab Radiometer analytical.

Cathodes were prepared by coating a  $\text{Mo}_6\text{S}_8$ -carbon composite slurry (75%  $\text{Mo}_6\text{S}_8$ , 15% carbon black, 10% polyvinylidene fluoride binder) on a stainless steel disc and dried at  $120^\circ\text{C}$  for 12 h. Typically, each electrode contained about 1.5 mg of the active material. 100- $\mu\text{m}$ -thick Mg foil (Goodfellow) was used as the negative electrode and a borosilicate glass fiber sheet as separator. The cells were placed in an incubator to maintain a constant temperature of  $25 \pm 0.1^\circ\text{C}$ . The electrochemical studies were carried out using an Arbin battery cycling unit.

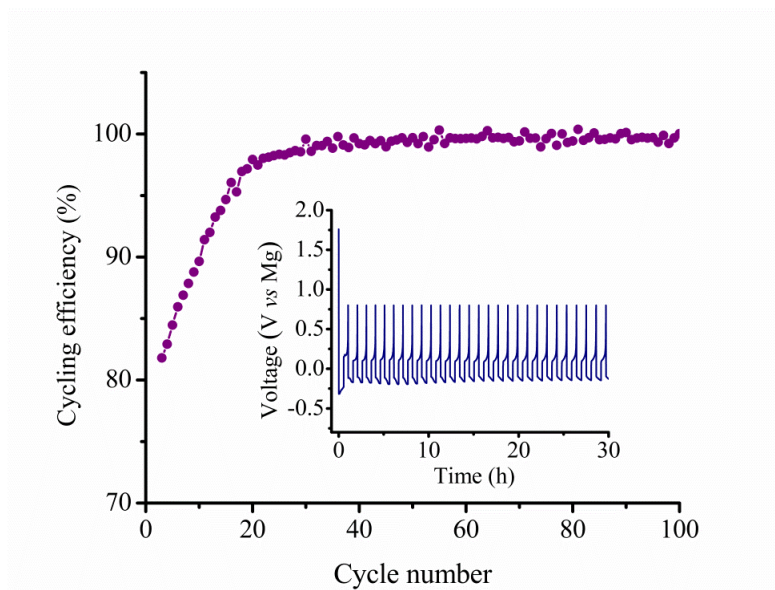

**Fig. S1** Cycling efficiency and the first 30 chronopotentiograms (insert) of Mg deposition/dissolution on Pt in 1 M diglyme solution of  $\text{MgCl}_2\text{-Et}_2\text{AlCl}$

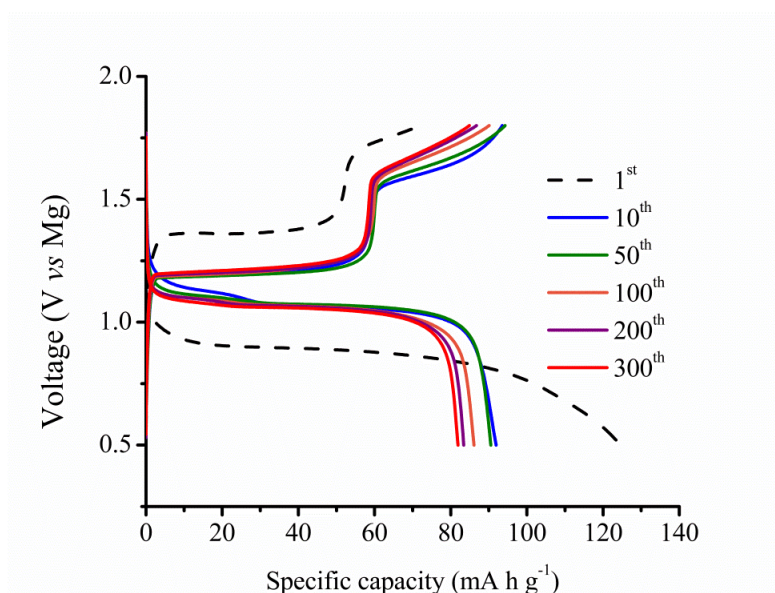

**Fig. S2** Cycling behaviour of the rechargeable Mg/Mo<sub>6</sub>S<sub>8</sub> cell using 1 M tetraglyme solution of MgCl<sub>2</sub>-Et<sub>2</sub>AlCl at a current rate of 20 mA g<sup>-1</sup> at 25 °C.

Table S5 Conductivity of the electrolytes

| Electrolyte (1M)                                   | Conductivity (mS cm <sup>-1</sup> ) |
|----------------------------------------------------|-------------------------------------|
| Et <sub>2</sub> AlCl-MgCl <sub>2</sub> -tetraglyme | 0.9                                 |
| Et <sub>2</sub> AlCl-MgCl <sub>2</sub> -diglyme    | 3.0                                 |
| Et <sub>2</sub> AlCl-MgCl <sub>2</sub> -THF        | 3.2                                 |
| EtAlCl <sub>2</sub> -MgCl <sub>2</sub> -tetraglyme | 1.0                                 |
| Et <sub>3</sub> Al-MgCl <sub>2</sub> -THF          | 1.8                                 |
| Et <sub>3</sub> Al-MgCl <sub>2</sub> -tetraglyme   | 0.8                                 |

## References

1. Jaguar 8.0, 2012, Schrodinger Inc.
2. Becke, A. D., *J. Chem. Phys.* 1993, **98**, 5648–5652.
3. Lee, C. T., Yang, W. T. and Parr, R. G., *Phys. Rev. B* 1988, **37**, 785–789.
4. D. Aurbach, N. Pour, Y. Gofer and D. T. Major, *J. Am. Chem. Soc.*, 2011, **133**, 6270–6278.
5. <http://www.wuestgroup.com/Solvent%20Properties.pdf>
6. P. Firman, M. Xu, E. M. Eyring and S. Petrucci, *J. Phys. Chem.* 1993, **97**, 3606–3613.
7. The probe radius,  $r$ , is calculated from the molecular mass,  $m$ , the density of the solvent at 20° C,  $\rho$ , and the packing density,  $\Delta$ , which assumed to be 0.5 for liquids:  $r^3 = 3m\Delta/4\pi\rho$ .
8. K. B. Starowieyski, S. Pasynkiewicz and M. Danutaskowrońska, *J. Organometal. Chem.*, 1971, **31**, 149–155.
9. G. M. Sheldrick, *Acta Crystallogr., Sect. A* 2008, **64**, 112–122.
